# Supplementary material
Source: publisher figshare collection journal article supplement (https://frontiersin.figshare.com/ndownloader/files/14557163)
Supplement: Supplementary file [file 14557163]

## Triglycerides change in different subgroups

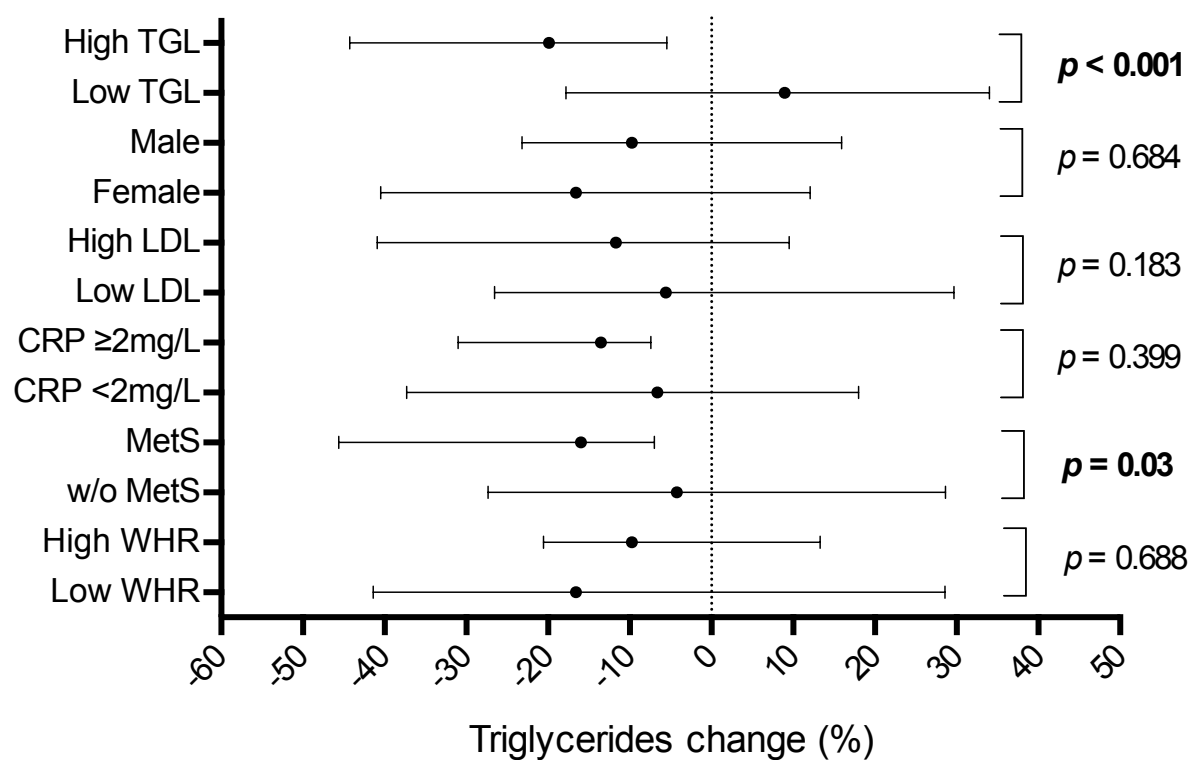

High/Low TGL is defined on median baseline values.

Triglycerides change is shown as median and interquartile range.

$p$ -values refer to the difference in the subgroups shown on the left.

TGL: triglycerides. CRP: c-reactive protein. MetS: metabolic syndrome. WHR: waist-hip ratio.

### HDL change in different subgroups

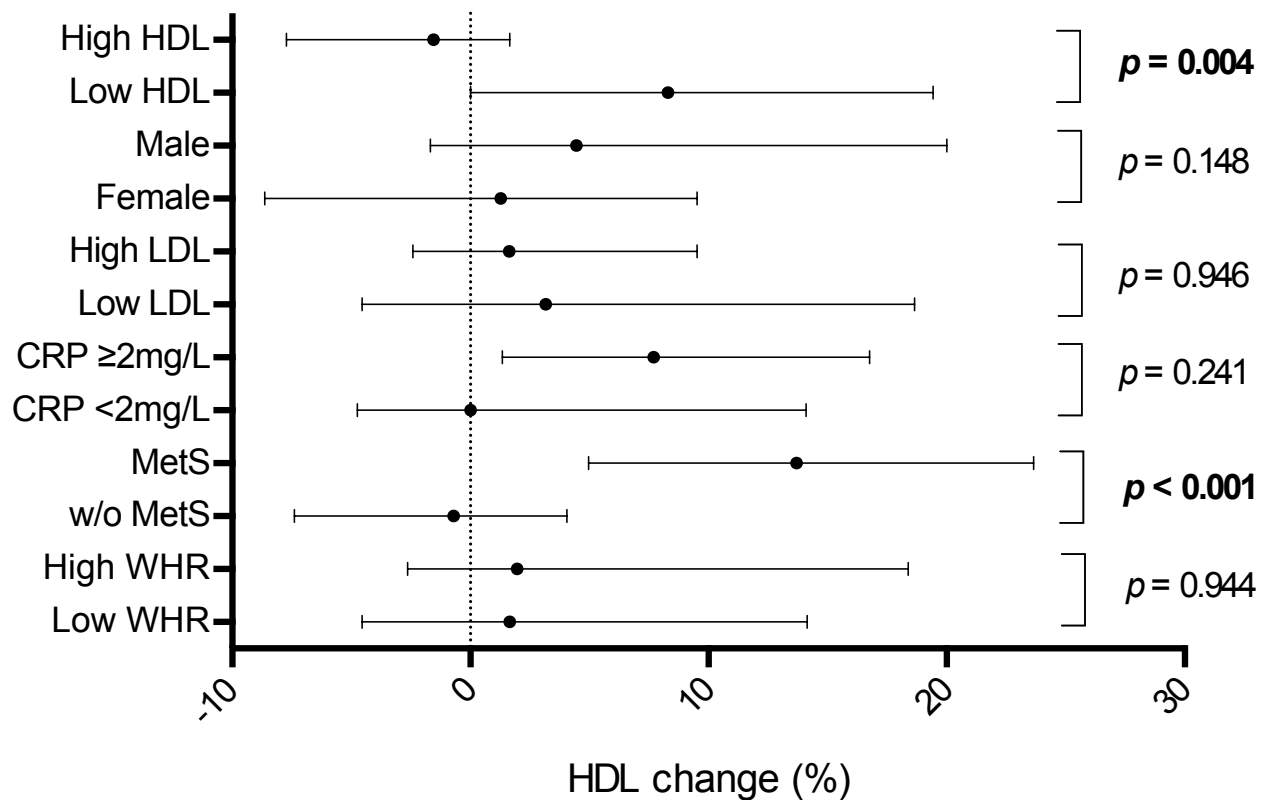

High/Low HDL is defined on median baseline values.

HDL change is shown as median and interquartile range.

p-values refer to the difference in the subgroups shown on the left.

CRP: c-reactive protein. MetS: metabolic syndrome. WHR: waist-hip ratio.

### ApoB change in different subgroups

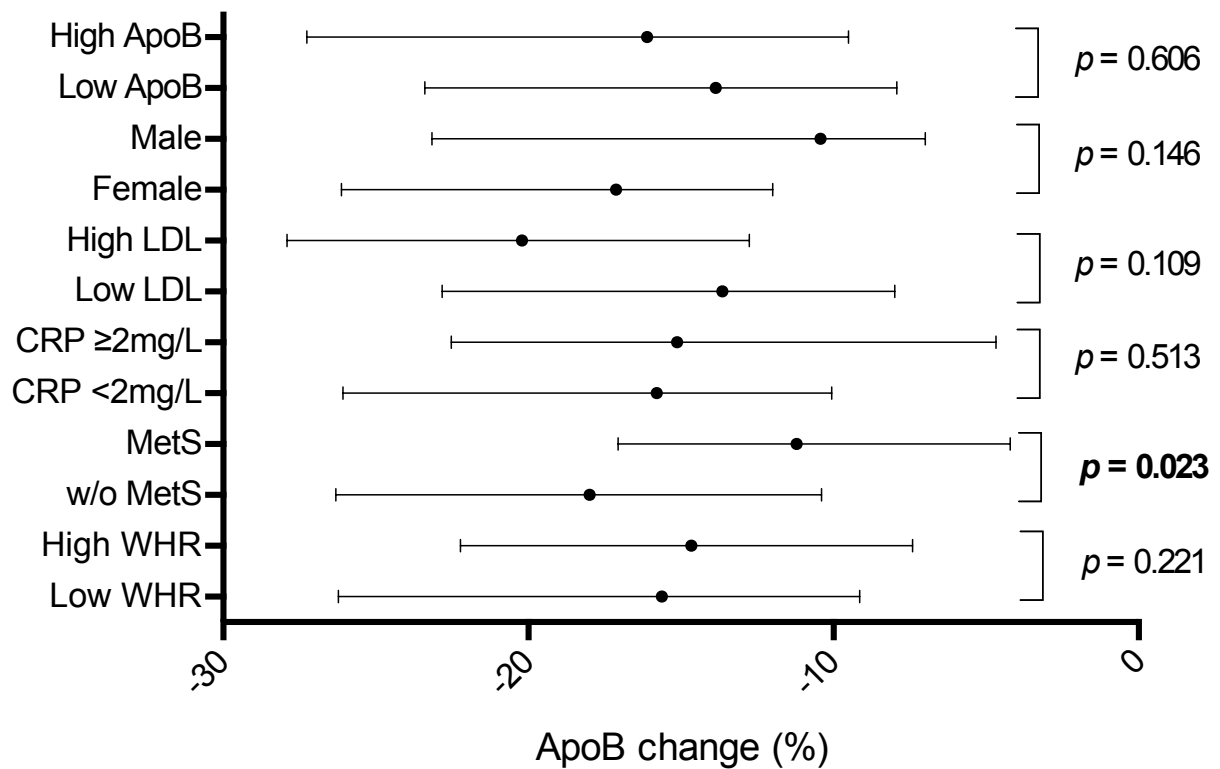

High/Low ApoB is defined on median baseline values.

ApoB change is shown as median and interquartile range.

p-values refer to the difference in the subgroups shown on the left.

CRP: c-reactive protein. MetS: metabolic syndrome. WHR: waist-hip ratio.

### ApoA1 change in different subgroups

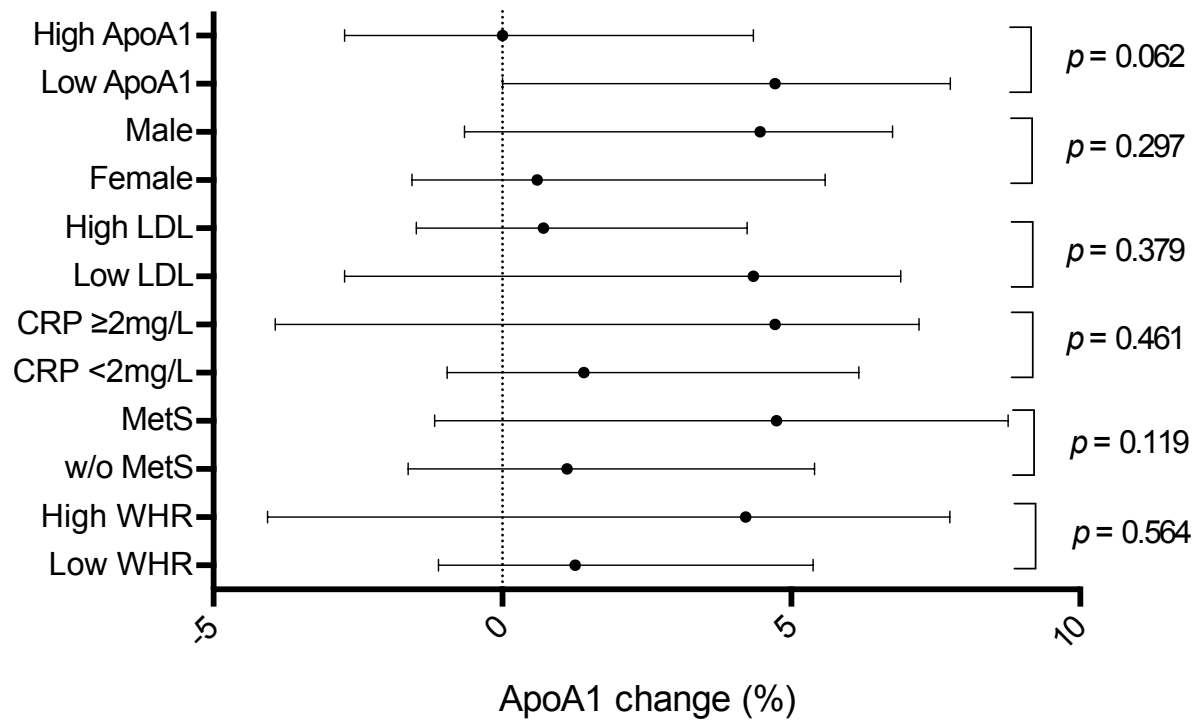

High/Low ApoA1 is defined on median baseline values.

ApoA1 change is shown as median and interquartile range.

p-values refer to the difference in the subgroups shown on the left.

CRP: c-reactive protein. MetS: metabolic syndrome. WHR: waist-hip ratio.
